# Supplementary material
Source: MDPI journal article supplement (https://www.mdpi.com/2311-553X/10/3/31)
Supplement: s1 [file s1]

*Supplementary Material*

**The RNAi machinery in the fungus *Fusarium fujikuroi* is not  
very active in synthetic medium and is related to  
transposable elements**

Javier Pardo-Medina, Tim A. Dahlmann, Minou Nowrousian,

M. Carmen Limón, and Javier Avalos

Supplementary Figures

Figure S1 a

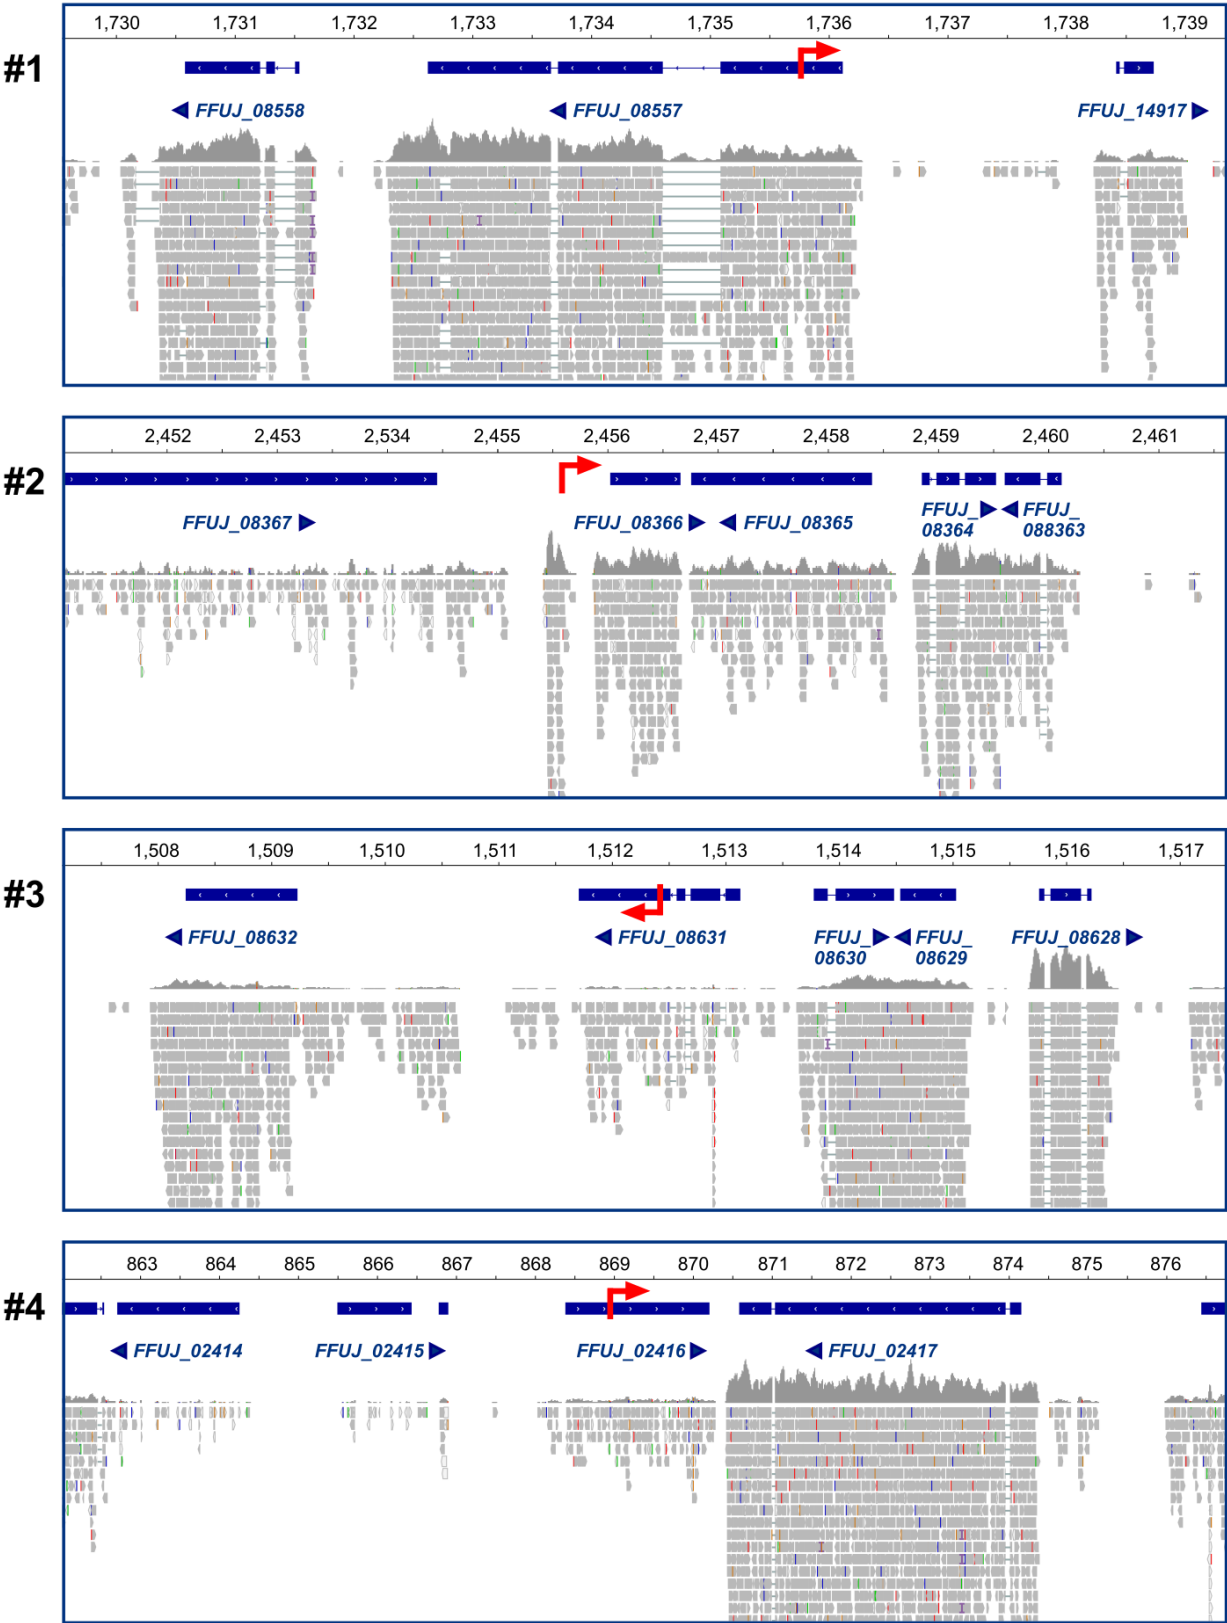

Figure S1 a (cont.)

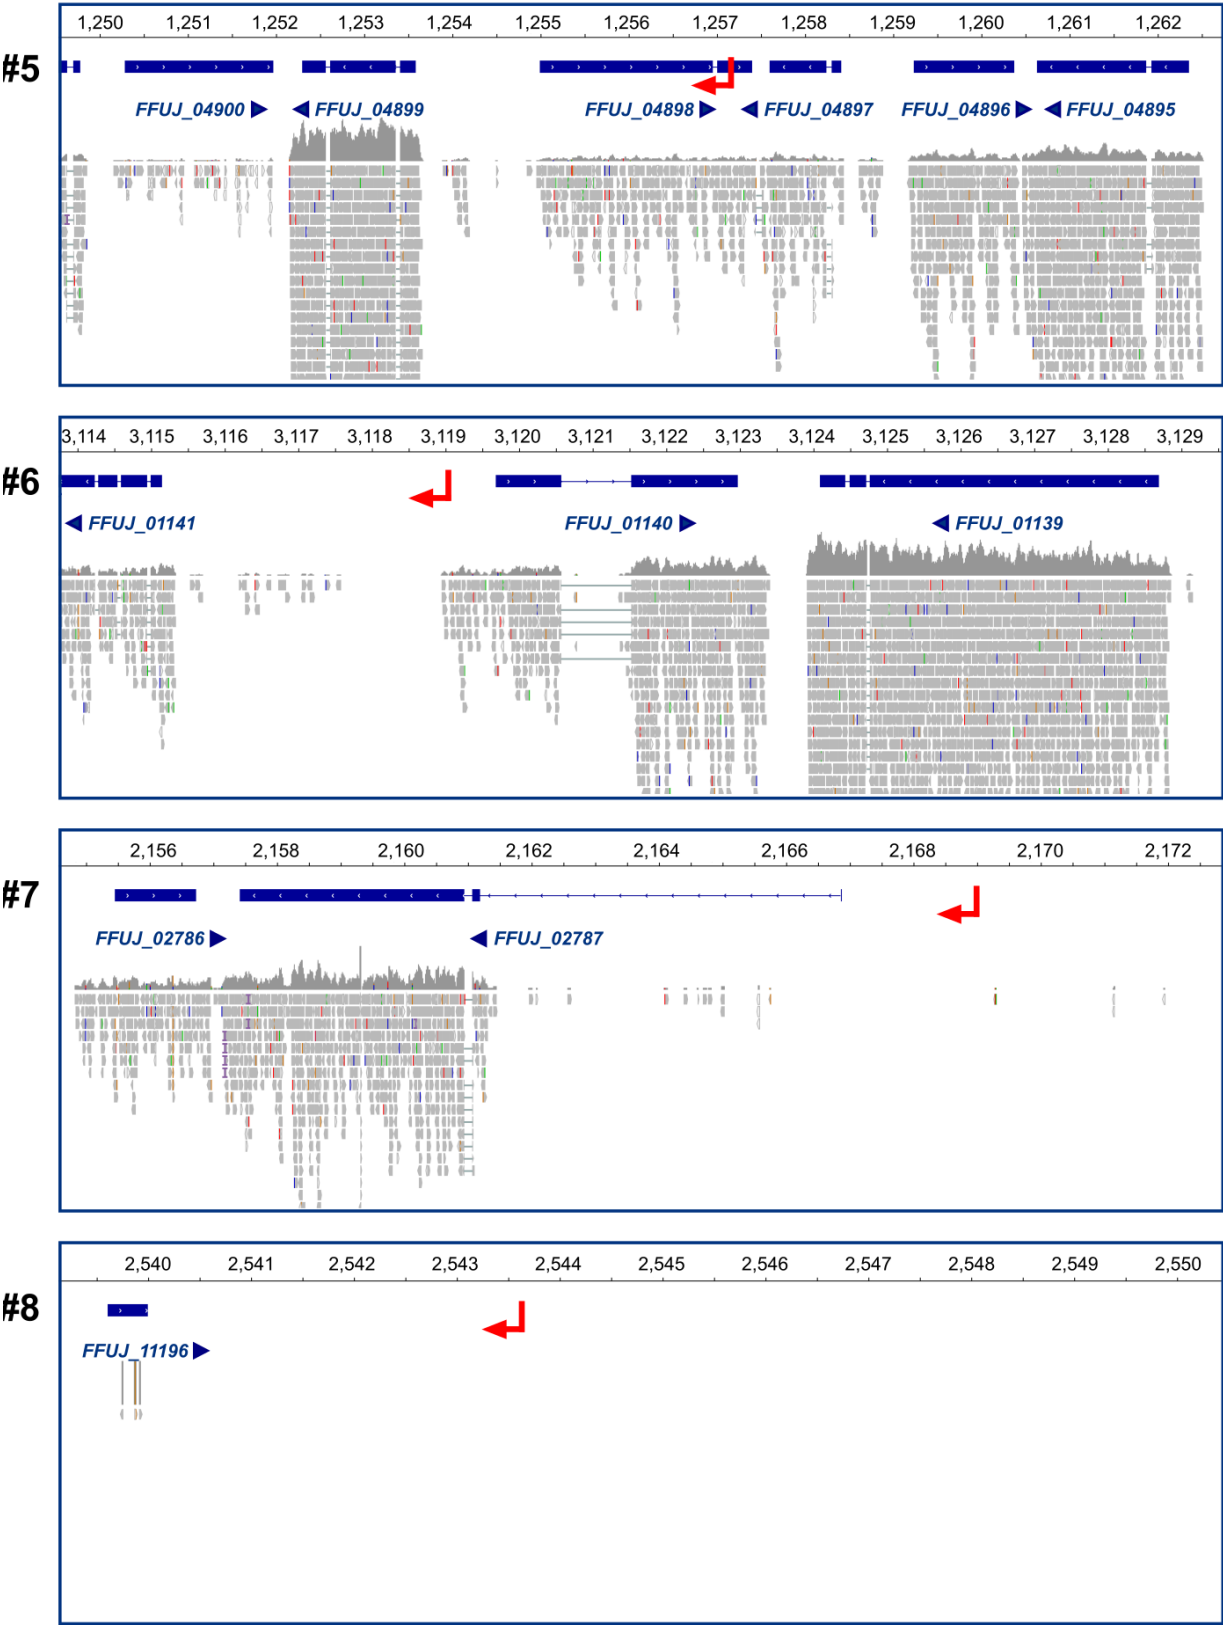

Figure S1 a (cont.)

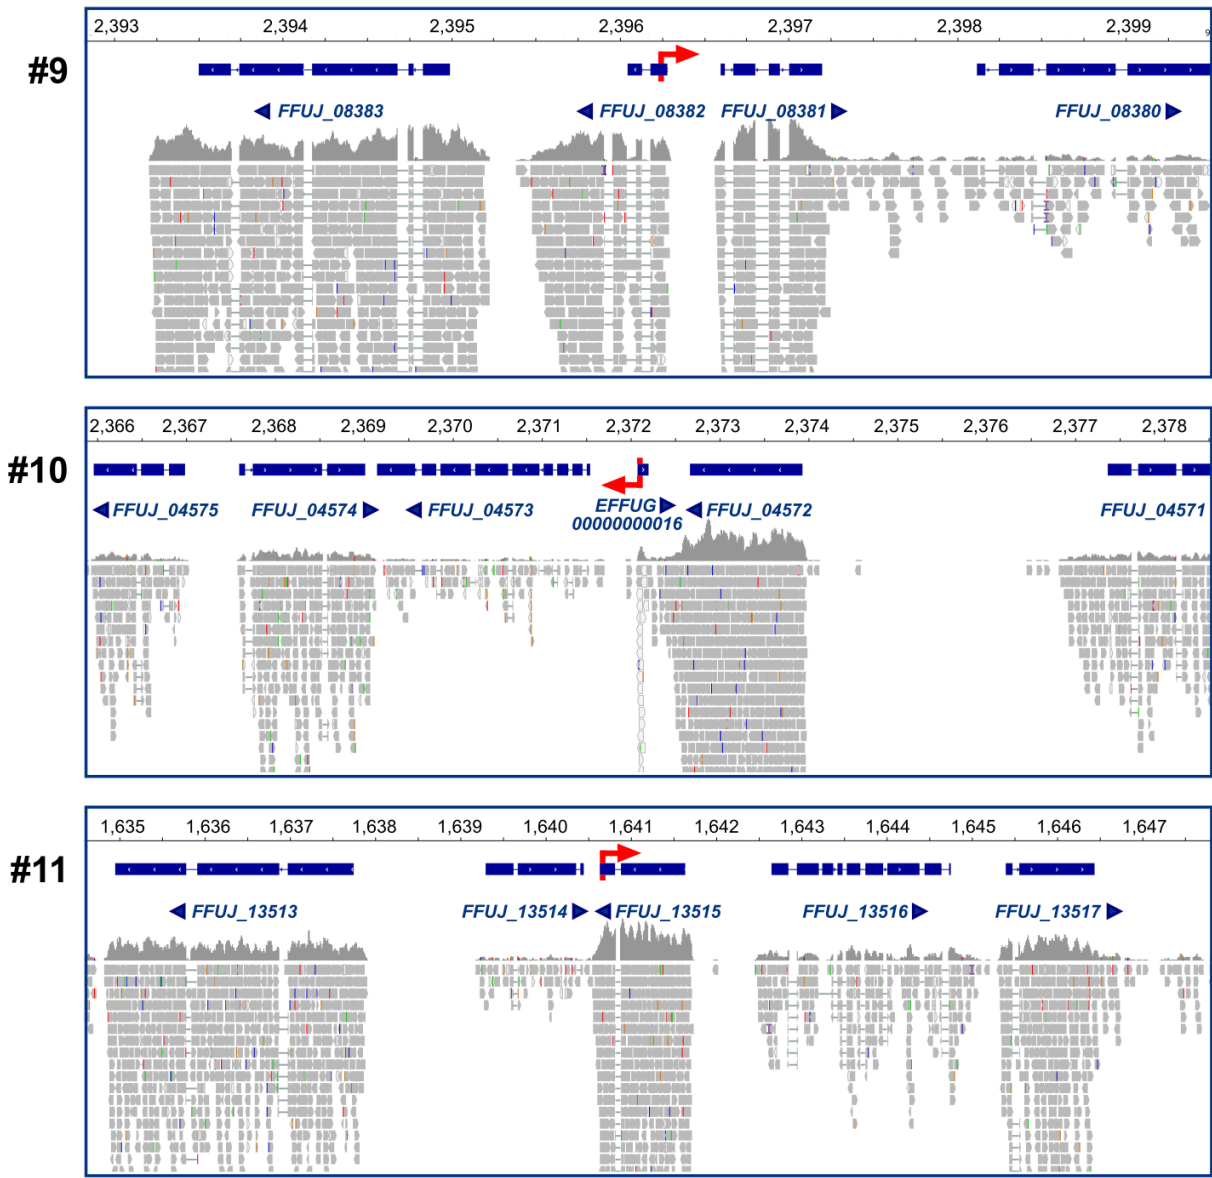

Figure S1 b

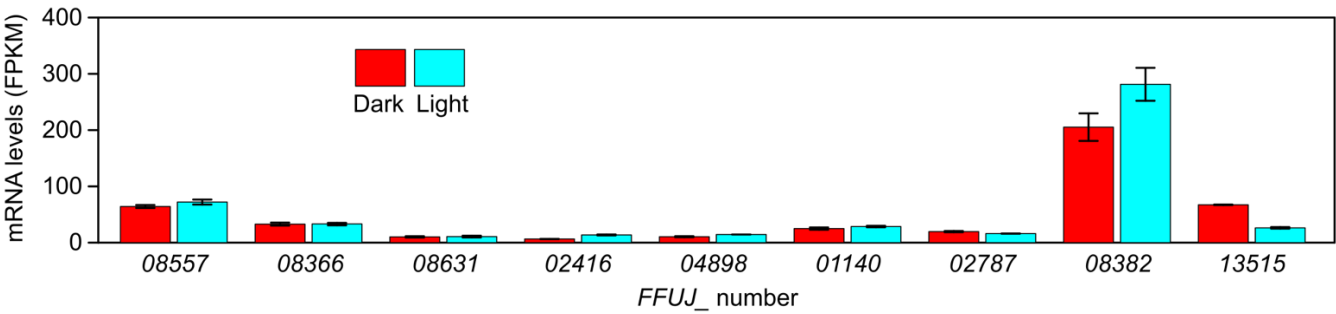

**Figure S1. Expression at the genomic locations of the predicted milRNAs in the *F. fujikuroi* genome.** (a) Transcript readings in the wild type in the genomic regions where the genes of the eleven predicted miRNA-like RNAs described in Table 2 are located. Gene names and orientation of the annotated genes are indicated in blue. Positions in kb for the chromosomes indicated in Table 3 are shown on top of each graph. The location and transcription sense of the predicted milRNAs are highlighted in red. Readings and genomic location viewed with the IGV program (Integrative Genomics Viewer, version 2.16). Readings correspond to one of the two samples from the wild type grown in the dark. For more information, see Figure 6. (b) Transcript levels (FPKM) in the wild type grown in the dark or after one hour illumination (light) of the nine *FFUJ\_* genes in whose ORFs or putative promoter sequences are encoded the microRNAs shown in Table 2. RNA samples are the same from which the sRNAs were analyzed.

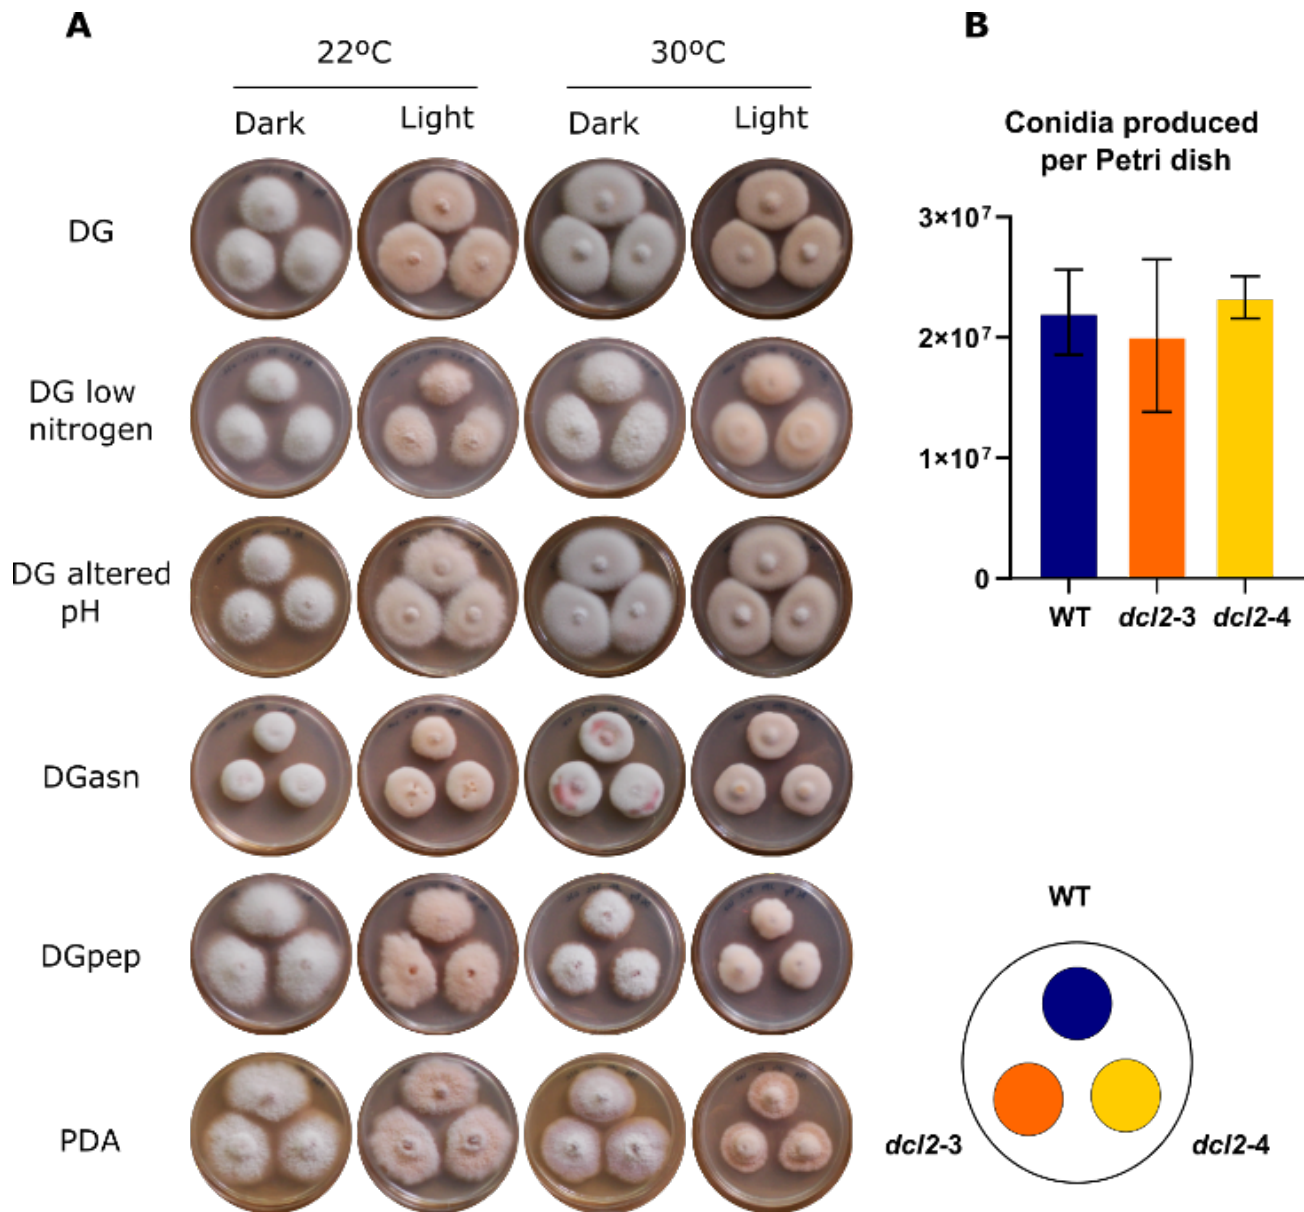

**Figure S2. Phenotypic characterization of  $\Delta dcl2$  transformants.** (a) Growth and pigmentation of wild strain and  $\Delta dcl2$  mutants *dcl2-3* (SG293) and *dcl2-4* (SG294) in the following media: DG: minimal medium, DG low nitrogen: DG with  $0.3 \text{ g l}^{-1} \text{ NaNO}_3$ , DG with altered pH: DG with  $\text{K}_2\text{HPO}_4$  (neutral pH) instead of  $\text{H}_2\text{KPO}_4$  (acidic pH), DGasn: DG with asparagine instead of nitrate, DGpep: DG supplemented with  $2 \text{ g l}^{-1}$  peptone, PDA: potato dextrose agar. All strains were cultured per triplicate in each medium for one week at  $22^\circ\text{C}$  or  $30^\circ\text{C}$ , in the dark and under continuous illumination. Disposition of the three strains in the Petri dishes in the medium screening is shown on the right. (b) Conidia production of the wild strain and the two  $\Delta dcl2$  mutants on EG medium. The values are the average of four independent determinations. The bar represents  $\pm$  standard error.

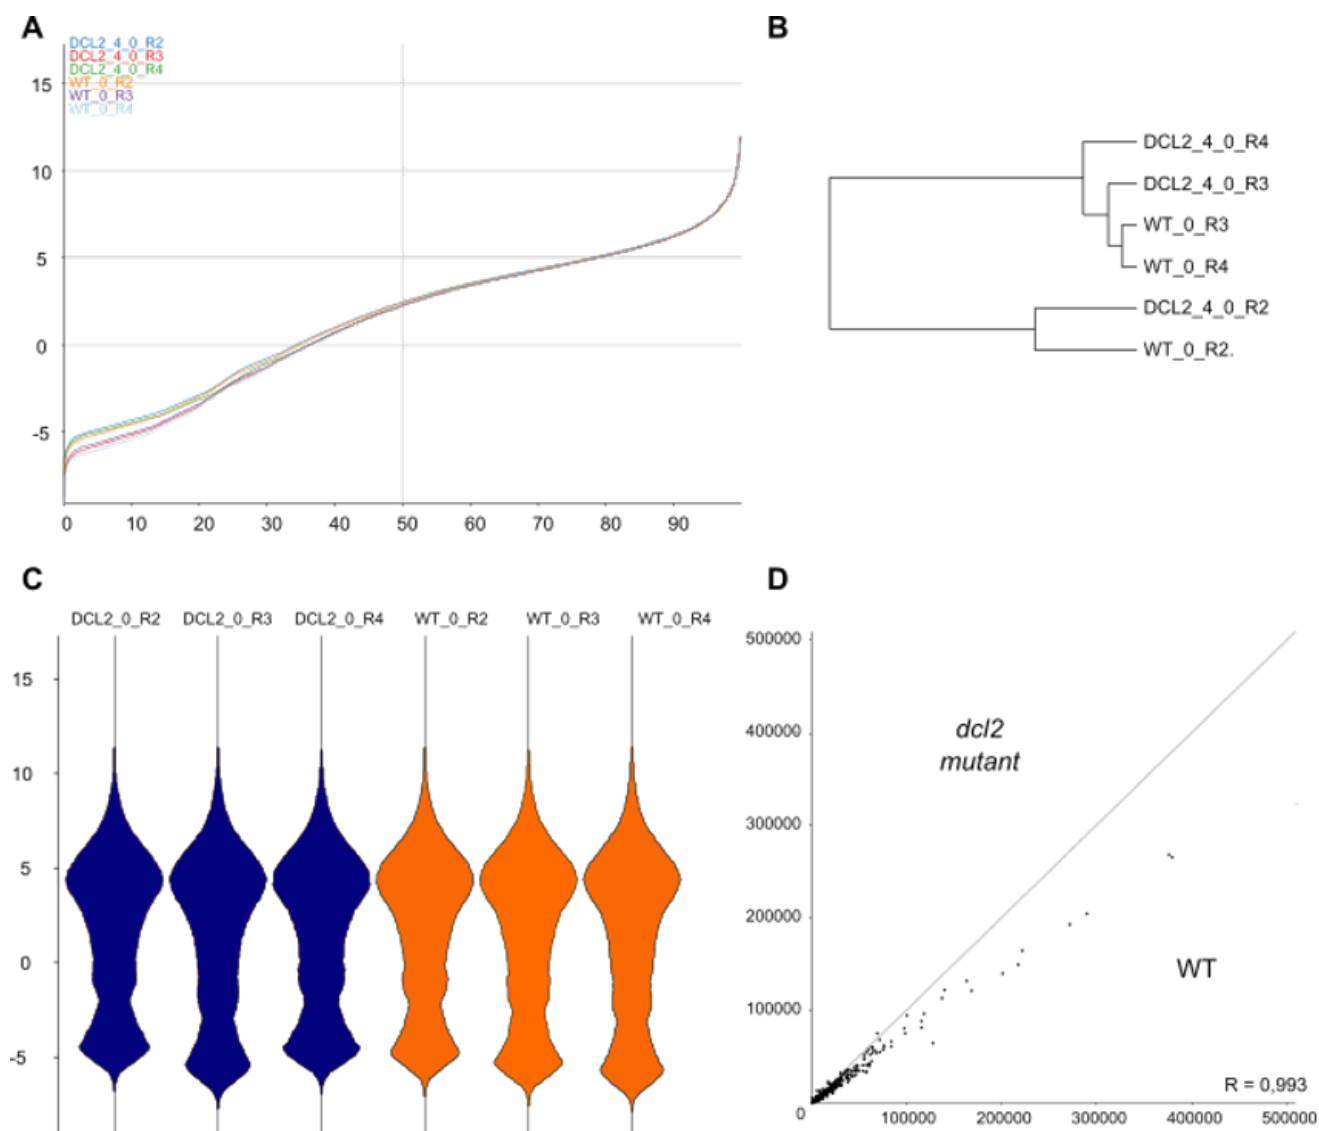

**Figure S3. Dispersion and distribution graphs of RNA-seq samples from the wild-type strain and *dcl2* mutant.** (a) Cumulative distribution plot after percentile normalization. The plot orders the probe values from lowest to highest, and then samples this set of values at common percentiles through the distribution. The x-axis therefore shows how far through the distribution we are looking, and the y-axis shows the value that the probe in that position has in that data store. (b) Neighbor joining tree calculated using a Pearson correlation to obtain a distance matrix between all the samples (rpm). (c) Bean distribution plots. (d) Scatter plot representation comparing the transcriptomes (log2 rpm values of each gene) of the wild-type strain (WT) and the  $\Delta dcl2$  mutant.

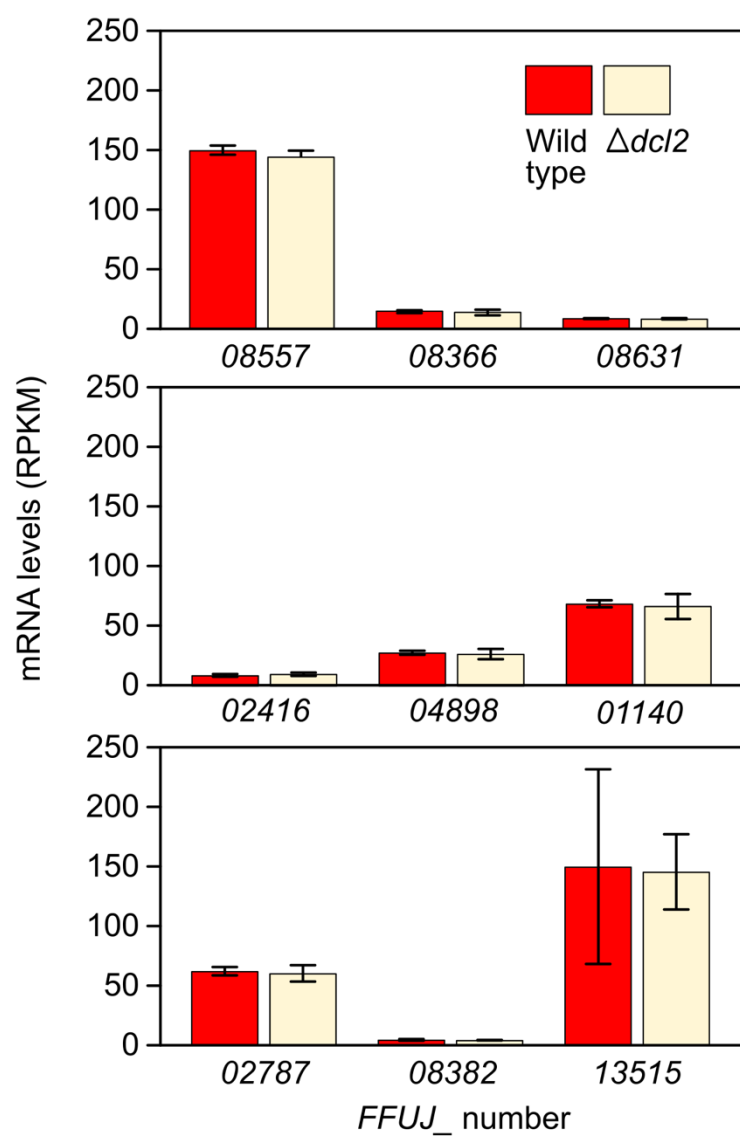

**Figure S4.** Effect of *dcl2* deletion on transcript levels (RPKM) in the dark for the nine *FFUJ* genes in whose ORFs or putative promoter sequences are encoded the miRNAs shown in Table 2.



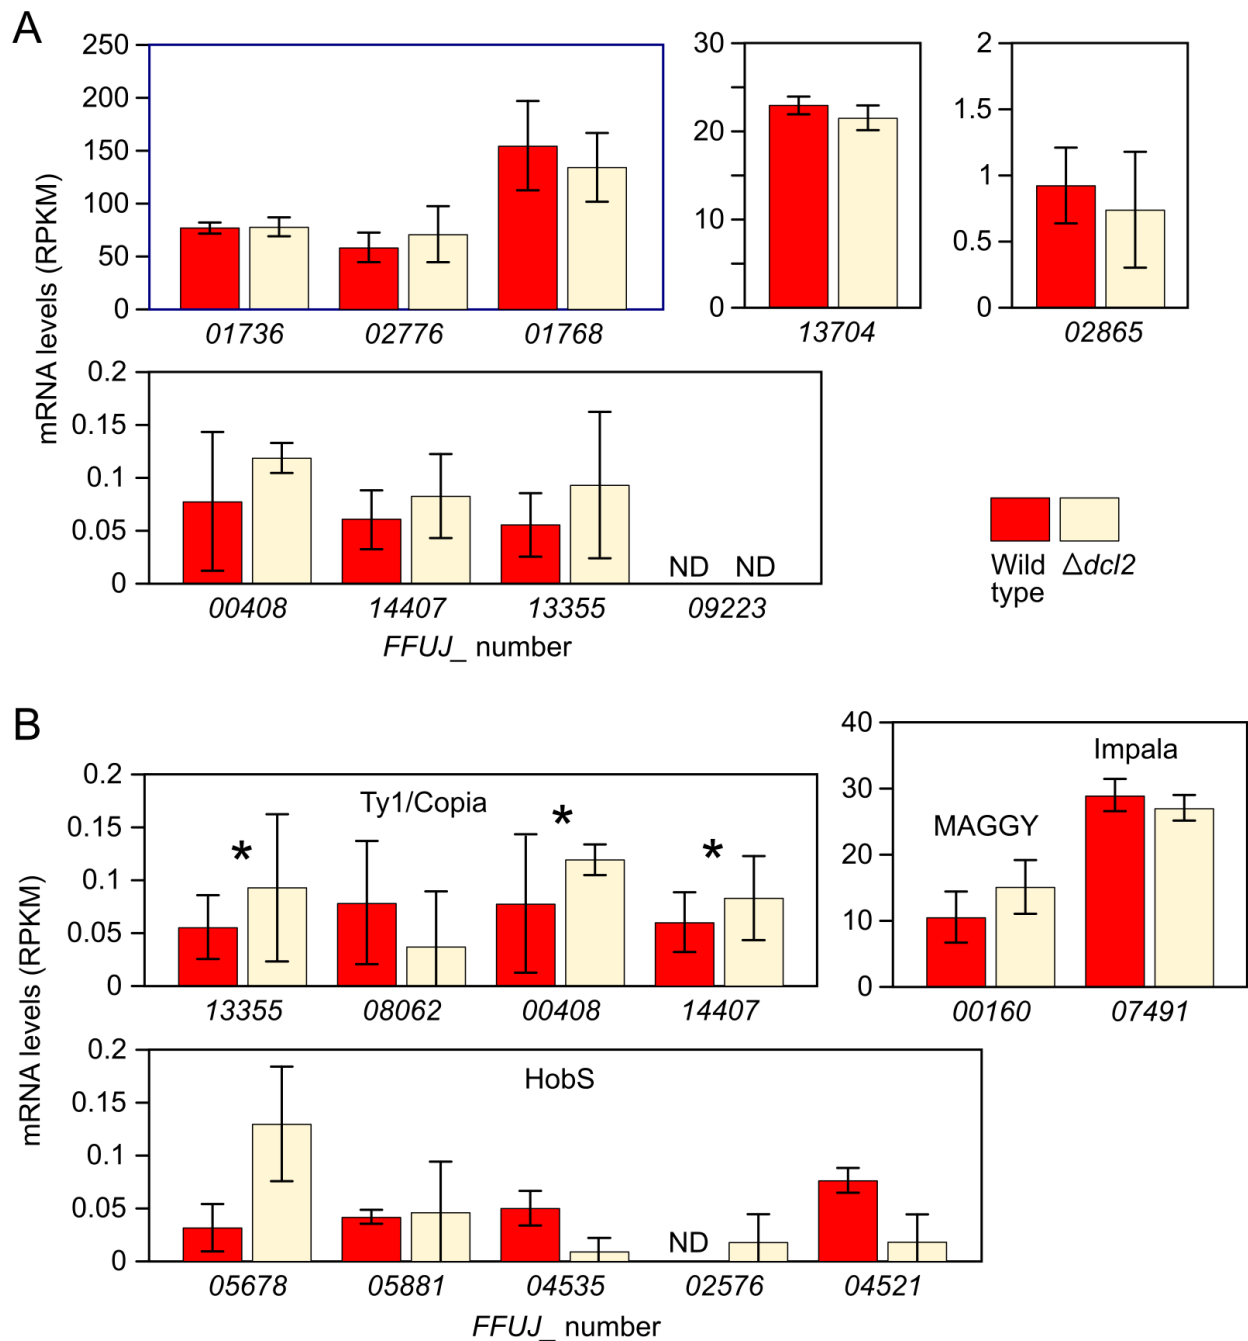

**Figure S5.** Effect of *dcl2* deletion on transcript levels (RPKM) in the dark of the putative miRNAs target *FFUJ\_* genes described in Table 3 (A) and of the annotated *FFUJ\_* genes for transposable elements described in Table 1 (B). The asterisk indicates three transposable elements found as possible targets of miRNAs in Table 3. ND: Non detected.

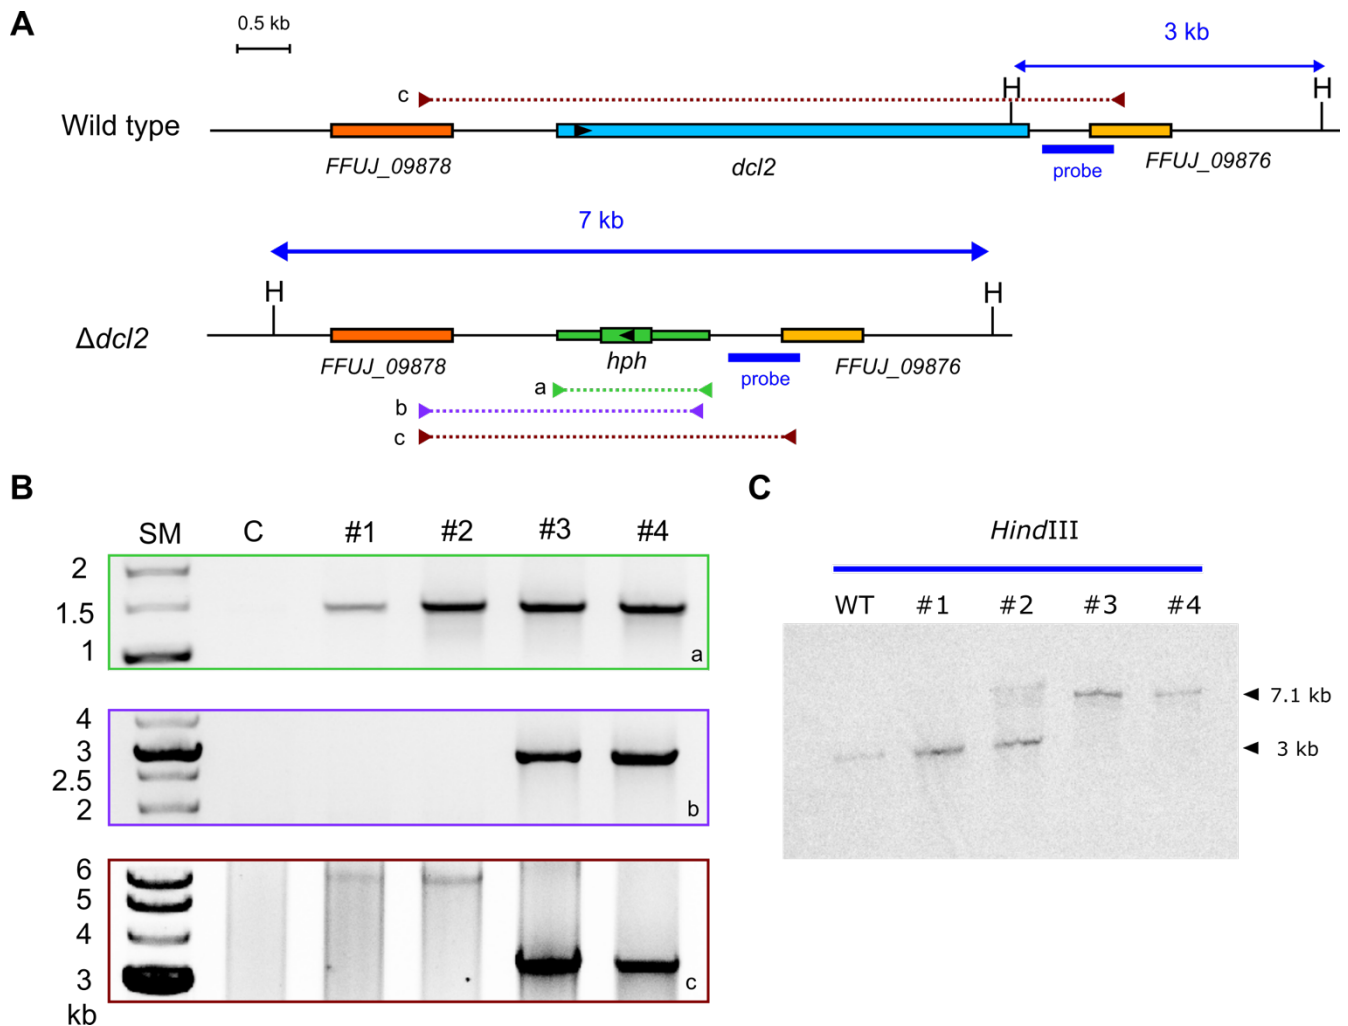

**Figure S6. Molecular analysis of the deletion of the *dcl2* gene in the *F. fujikuroi* wild-type strain.** (a) Genomic map covering the area for the wild strain (WT) and the  $\Delta dcl2$  mutants showing the replacement with *hph* gene. (b) PCR amplifications of transformants #1, #2, #3, and #4 to select candidates with the correct replacement of *dcl2*. Primer sets (PS) used to amplify relevant regions are indicated on the map with colored arrowheads and their corresponding products are indicated with colored dotted lines. Expected band sizes in positive transformants for the different PCRs are 1,432 bp for amplicon a (in green) using PS3 primer set, 2,781 bp for amplicon b (purple) using PS4 primer set, and 3,660 bp for reaction c (red) using PS5 primer set. In the wild strain no amplification was expected for reactions a (green) and b (purple), while a band of 6,842 bp was expected for reaction c (red). (c) Southern blot of transformants #1, #2, #3, and #4 to test the correct integration. SM: Size markers. C: DNA-free control. *HindIII* restriction sites are indicated as H. Hybridization probe is indicated in the upper map as a blue bar and the expected hybridization products as blue lines, including the expected sizes of the bands in the Southern blot. The 769-pb probe was amplified with PS6 primer set.

## Supplementary Tables

**Table S1.** Mapping results of sRNA sequencing.

| Organism            | Type of reads          | Total reads | Mapped reads            | Unmapped reads         | Reads discarded by -m 5 |
|---------------------|------------------------|-------------|-------------------------|------------------------|-------------------------|
| <i>F. fujikuroi</i> | All reads              | 153,264,248 | 115,369,397<br>(75.3 %) | 24,828,229<br>(16.2 %) | 13,066,622<br>(8.5 %)   |
|                     | Collapsed reads        | 6,612,908   | 4,447,147<br>(67.3 %)   | 2,105,318<br>(31.8 %)  | 60,443<br>(0.91 %)      |
|                     | Collapsed reads (x≥10) | 272,776     | 195,387<br>(71.6 %)     | 67,398<br>(24.7 %)     | 9,991<br>(3.7 %)        |
| <i>F. oxysporum</i> | All reads              | 173,210,120 | 18,021,169<br>(10.4 %)  | 12,125,747<br>(7.0 %)  | 143,063,204<br>(82.6 %) |
|                     | Collapsed reads        | 7,034,397   | 3,920,202<br>(55.7 %)   | 2,096,047<br>(29.8 %)  | 1,018,148<br>(14.5 %)   |
|                     | Collapsed reads (x≥10) | 305,475     | 76,281<br>(25.0 %)      | 51,981<br>(17.0 %)     | 177,213<br>(58.0 %)     |

**Table S2.** Reads mapping to predicted ribosomal DNA.

| Organism                                                         | Type of reads   | Total reads | Reads mapping to rDNA   | Unmapped reads          |
|------------------------------------------------------------------|-----------------|-------------|-------------------------|-------------------------|
| <i>F. fujikuroi</i>                                              | Total reads     | 153,264,248 | 25,029,046<br>(16.3 %)  | 128,235,202<br>(83.7 %) |
|                                                                  | Collapsed reads | 6,612,908   | 251,425<br>(3.8 %)      | 6,361,483<br>(96.2 %)   |
| <i>F. oxysporum</i>                                              | Total reads     | 173,210,120 | 127,479,642<br>(73.6 %) | 45,730,478<br>(26.4 %)  |
|                                                                  | Collapsed reads | 7,034,397   | 866,926<br>(12.3 %)     | 6,167,471<br>(87.7 %)   |
| <i>F. fujikuroi</i><br>(incl. rDNA from<br><i>F. oxysporum</i> ) | Total reads     | 153,264,248 | 107,751,205<br>(70.3 %) | 45,513,043<br>(29.7 %)  |
|                                                                  | Collapsed reads | 6,612,908   | 740,534<br>(11.2 %)     | 5,872,374<br>(88.8 %)   |

**Table S3.** Origin of sRNAs in *Fusarium*. Relevant data are marked in red. Predicted rDNAs of both *Fusarium* species were used for calculation of rRNA-mapping reads in *F. fujikuroi* and *F. oxysporum*.

| Feature    | Strand    | <i>F. fujikuroi</i> |                 |                        | <i>F. oxysporum</i> |                 |                        |
|------------|-----------|---------------------|-----------------|------------------------|---------------------|-----------------|------------------------|
|            |           | Total reads         | Collapsed reads | Collapsed reads (x≥10) | Total reads         | Collapsed reads | Collapsed reads (x≥10) |
| rRNA       | Sense     | 107,441,729         | 734,758         | 137,200                | 132,061,732         | 894,041         | 162,931                |
|            | Antisense | 1,438,898           | 53,471          | 7,023                  | 2,495,057           | 25,796          | 3,250                  |
| tRNA       | Sense     | 10,061,987          | 42,861          | 6,378                  | 8,668,518           | 49,186          | 7,132                  |
|            | Antisense | 70,482              | 3,372           | 34                     | 100,435             | 3,192           | 17                     |
| CDS        | Sense     | 5,911,950           | 2,759,531       | 251,402                | 5,763,287           | 2,504,352       | 11,297                 |
|            | Antisense | 7,978,889           | 243,429         | 14,888                 | 2,563,605           | 182,700         | 1,322                  |
| Intron     | Sense     | 2,719,506           | 104,448         | 6,982                  | 2,555,759           | 122,882         | 7,165                  |
|            | Antisense | 7,712,652           | 39,037          | 2,584                  | 4,649,363           | 94,585          | 9,982                  |
| Intergenic | Both      | 111,807,186         | 1,633,420       | 155,047                | 153,725,629         | 2,493,370       | 234,515                |

**Table S4.** Formation of small RNAs within genomic features in sense orientation (dark vs. light). The listed genes show a downregulation of  $\log_2 < -1$  and an adjusted  $p$ -value  $< 0.1$ .

| Gene ID    | Functional annotation                                     | Base Mean | log2FC | lfcSE | stat | P-value  | padj     |
|------------|-----------------------------------------------------------|-----------|--------|-------|------|----------|----------|
| FFUJ_08272 | uncharacterized protein                                   | 349.39    | -4.14  | 0.37  | 8.39 | 4.94E-17 | 1.76E-13 |
| FFUJ_11803 | <i>carB</i>                                               | 626.88    | -4.01  | 0.37  | 8.19 | 2.58E-16 | 4.60E-13 |
| FFUJ_11804 | <i>carO</i>                                               | 318.30    | -3.95  | 0.38  | 7.75 | 9.21E-15 | 1.09E-11 |
| FFUJ_01292 | uncharacterized protein                                   | 329.32    | -3.84  | 0.37  | 7.57 | 3.87E-14 | 3.44E-11 |
| FFUJ_09320 | related to Rds1 protein                                   | 230.73    | -3.68  | 0.38  | 7.02 | 2.22E-12 | 1.58E-09 |
| FFUJ_06055 | <i>vvdA</i>                                               | 267.11    | -3.57  | 0.38  | 6.79 | 1.11E-11 | 6.57E-09 |
| FFUJ_13896 | related to TGF beta induced protein ig-h3 precursor       | 461.74    | -3.45  | 0.37  | 6.63 | 3.32E-11 | 1.69E-08 |
| FFUJ_01088 | related to short-chain alcohol dehydrogenase              | 913.82    | -3.21  | 0.38  | 5.85 | 4.99E-09 | 2.22E-06 |
| FFUJ_11802 | <i>carRA</i>                                              | 245.30    | -3.12  | 0.37  | 5.67 | 1.39E-08 | 4.97E-06 |
| FFUJ_12435 | uncharacterized protein                                   | 87.71     | -3.12  | 0.40  | 5.35 | 9.01E-08 | 2.92E-05 |
| FFUJ_04335 | uncharacterized protein                                   | 1042.24   | -3.05  | 0.36  | 5.68 | 1.38E-08 | 4.97E-06 |
| FFUJ_09119 | related to flavin-containing amine oxidasedehydrogenase   | 114.61    | -2.80  | 0.39  | 4.58 | 4.61E-06 | 1.37E-03 |
| FFUJ_11801 | <i>carX</i>                                               | 76.47     | -2.66  | 0.40  | 4.18 | 2.94E-05 | 8.04E-03 |
| FFUJ_05732 | <i>cryD</i>                                               | 169.08    | -2.52  | 0.39  | 3.92 | 9.03E-05 | 2.14E-02 |
| FFUJ_08014 | related to formaldehyde dehydrogenase                     | 97.23     | -2.50  | 0.39  | 3.83 | 1.27E-04 | 2.83E-02 |
| FFUJ_05515 | probable ATP-binding multidrug cassette transport protein | 1024.56   | -2.46  | 0.36  | 4.09 | 4.28E-05 | 1.09E-02 |
| FFUJ_00295 | <i>con10</i>                                              | 110.77    | -2.37  | 0.39  | 3.51 | 4.53E-04 | 9.39E-02 |
| FFUJ_07515 | related to arabinose 5-phosphate isomerase                | 145.09    | -2.34  | 0.38  | 3.49 | 4.74E-04 | 9.39E-02 |

**Table S5.** De novo predicted miRNA-like RNAs in the merged sRNA dataset of *F. fujikuroi*.

| ID <sup>1</sup>  | Score  | Read count |        |      |      | p-value | Mature sequence                 | Precursor sequence<br>(mature sequence underlined)                                               |
|------------------|--------|------------|--------|------|------|---------|---------------------------------|--------------------------------------------------------------------------------------------------|
|                  |        | Total      | Mature | Loop | Star |         |                                 |                                                                                                  |
| VII_86570<br>#1  | 1.3e+1 | 34         | 33     | 0    | 1    | no      | UGGGACGAGGA<br>CAAGGCUGAA       | <u>UGGGACGAGGACAAGGCUGAAU</u><br>GGGGUUUAUGGUGGAAGGAUU<br>GUUGGCGCUCGCAU                         |
| VII_90055<br>#2  | 3.8    | 14         | 12     | 0    | 2    | no      | UCACCGUUAGA<br>CCAUUACAG        | UAUUGGGAUGGGCGGUUGAGCG<br>GGUUUGAACGCCU <u>UCACCGUUAG</u><br><u>ACCAUUACAG</u>                   |
| VII_98350<br>#3  | 2.7    | 5          | 4      | 0    | 1    | yes     | GUCCUGGAGGC<br>ACUUGA           | CGAGUAUACUUUGGUGCCUGAU<br>CAAGUUUACCCAAGGCAG <u>GUCCU</u><br><u>GGAGGCACUUGA</u>                 |
| III_209346<br>#4 | 2.3    | 2          | 1      | 0    | 1    | yes     | GGCGCGAGAAG<br>AGAUCGAGGAU<br>C | CCGGCAGAUUCUCGUCGACGGGCG<br>ACC <u>GGCGCGAGAAGAGAUCGAG</u><br><u>GAUC</u>                        |
| II_193099<br>#5  | 2.1    | 3          | 2      | 0    | 1    | yes     | AGCCCAAUCCU<br>GUGCCACU         | <u>AGCCCAAUCCUUGUGCCACUCAC</u><br>UAUGACACUGGUGGCAUCCUCUC<br>CCCGGUUGUGAGGACAGGGAU<br>GAACCU     |
| I_289987<br>#6   | 1.9    | 3          | 2      | 0    | 1    | yes     | AGAGGAAUCGA<br>CGAUGUGACU       | <u>AGAGGAAUCGACGAUGUGACUU</u><br>UGGCGUCAAAAGGUUGGUAGGUU<br>GGCGUCAAAAUGCGUUGUCGUA<br>CCUGAGGA   |
| III_235482<br>#7 | 1.5    | 68         | 42     | 26   | 0    | yes     | UGCAGAGCUUA<br>UUCUAUCCC        | <u>UGCAGAGCUUAUUCUAUCCCUUU</u><br>AGGCCUCCCGCUUCCUGCACUG<br>GAUUGGUUUAGAGGCUAAGGUA<br>AGCUCCCUUU |
| X_17800<br>#8    | 1.5    | 330        | 330    | 0    | 0    | yes     | UUAGGGUUAGG<br>GUUAGGGUUA       | GCCUCUUAACCUUCCCCGAUUA<br>CGAAAAUCUUGCGUUUUGCC <u>UU</u><br><u>AGGGUUAGGGUUAGGGUUA</u>           |
| VII_89770<br>#9  | 1.4    | 2          | 1      | 0    | 1    | yes     | UCCGAGCGCCAU<br>GGUUGAUGAGA     | UCUUGACCGUGGCUUUGGGGUA<br>UGGUUUCUU <u>UCCGAGCGCCAUGG</u><br><u>UUGAUGAGA</u>                    |
| II_198003<br>#10 | 0.6    | 25         | 25     | 0    | 0    | yes     | UUCCACUACCUA<br>UGGUCGUAU       | <u>UUCCACUACCUAUGGUCGUAUGU</u><br>ACCUAUUGACUAUGGGAAGAGG<br>AUAA                                 |
| IV_60042<br>#11  | 0      | 5          | 4      | 0    | 1    | no      | UCGACAACCUCG<br>UCUGCCUC        | <u>UCGACAACCUCGUCUGCCUCCA</u><br>GACAAGGGACUCCUGGUUACCUU<br>CAGACAGAGGAGAUCGGGGUAG<br>AGCC       |

<sup>1</sup> Chromosome and reference number.

Below, identification number used in the main text.

**Table S6.** Basic characteristics of the sequenced samples and yield of the readings.

| <b>Sample</b> | <b>Number of sequences</b> | <b>Average length</b> | <b>Average quality</b> | <b>G+C (%)</b> | <b>Mapping rate (%)</b> |
|---------------|----------------------------|-----------------------|------------------------|----------------|-------------------------|
| WT.0.R2       | 24235008                   | 75.35                 | 36.28                  | 52             | 98.48                   |
| WT.0.R3       | 34924904                   | 75.37                 | 36.31                  | 52             | 98.68                   |
| WT.0.R4       | 47559597                   | 75.35                 | 36.29                  | 52             | 98.70                   |
| dcl2.4.0.R2   | 20277079                   | 75.29                 | 36.28                  | 52             | 98.61                   |
| dcl2.4.0.R3   | 39929806                   | 75.29                 | 36.26                  | 52             | 98.51                   |
| dcl2.4.0.R4   | 21674473                   | 75.40                 | 36.32                  | 52             | 98.68                   |



**Table S7.** Summary of the sequencing characteristics of each RNA-seq sample.

|                     | Sample<br>name | Number of<br>trimmed<br>sequences | Average<br>length | Average<br>quality | Sequences<br>18-25 nt (%) |
|---------------------|----------------|-----------------------------------|-------------------|--------------------|---------------------------|
| <i>F. fujikuroi</i> | Ffuj_dark_R1   | 47609550                          | 38.84             | 39.41              | 11.97                     |
|                     | Ffuj_dark_R2   | 26679687                          | 35.57             | 39.33              | 19.09                     |
|                     | Ffuj_light_R1  | 52755629                          | 35.6              | 39.31              | 18.96                     |
|                     | Ffuj_light_R2  | 26219382                          | 39.8              | 39.4               | 7.68                      |
| <i>F. oxysporum</i> | Foxy_dark_R1   | 32247420                          | 35.17             | 39.32              | 19.07                     |
|                     | Foxy_dark_R2   | 46332088                          | 33.8              | 39.33              | 21.10                     |
|                     | Foxy_light_R1  | 47081719                          | 37.98             | 39.39              | 10.33                     |
|                     | Foxy_light_R2  | 47548893                          | 39.45             | 39.3               | 7.30                      |

**Table S8.** Primer sets used for PCR experiments.

| Primer set | Primer names      | 5'-3' Sequence                                            | Experimental use                             |
|------------|-------------------|-----------------------------------------------------------|----------------------------------------------|
| PS1        | Ff-dcl2-pRS246-F  | GTAACGCCAGGGTTTTCCCAGTCACGACGTGGC<br>TATCTGTGATTTTAGTGTAC | PCR 5' <i>dcl2</i><br>segment of<br>pDcl2hyg |
|            | Ff-dcl2-hph-R     | ATCCACTTAACGTTACTGAAATCTCCAACCATT<br>TTCCTATCATGGGGGAG    |                                              |
| PS2        | Ff-dcl2- pRS246-R | GCGGATAACAATTTACACAGGAAACAGCCCA<br>AAGTCGATGCCGCTCT       | PCR 3' <i>dcl2</i><br>segment<br>pDcl2hyg    |
|            | Ff-dcl2-hph-F     | CTCCTTCAATATCATCTTCTGTCTCCGACGAAG<br>GGGATCATGTACACGC     |                                              |
| PS3        | HPH-6F            | GTCGGAGACAGAAGATGATATTGAAGGAGC                            | PCR Hyg <sup>R</sup><br>cassette             |
|            | HPH-6R            | GTTGGAGATTTTCAGTAACG TTAAGTGGAT                           |                                              |
| PS4        | Ff-predcl2-1F     | CTCTTGTTGGCTTTCCATGCCG                                    | PCR test 5' <i>dcl2</i> -<br>HygR            |
|            | HPH-6F            | GTCGGAGACAGAAGATGATATTGAAGGAGC                            |                                              |
| PS5        | Ff-predcl2-1F     | CTCTTGTTGGCTTTCCATGCCG                                    | PCR test <i>dcl2</i> -<br>HygR               |
|            | Ff-postdcl2-1R    | CTTCTTGCGCACGACATACGAG                                    |                                              |
| PS6        | Ff-postdcl2-1F    | GGAAGGCACCCTAACTGAGAACTC                                  | Southern probe of<br><i>dcl2</i>             |
|            | Ff-postdcl2-1R    | CTTCTTGCGCACGACATACGAG                                    |                                              |
